# Supplementary material
Source: PubMed Central journal article supplement (PMC7295586)
Supplement: joces-133-245258-s1.pdf [file joces-133-245258-s1.pdf]

## Supplemental data

**Table S1. BioID and mass spectrometry of FAZ27-BirA\*-HA-induced cells (+Tet).** Shown are the proteins identified by mass spectrometry analysis of the biotinylated proteins purified from cells expressing FAZ27-BirA\*-HA.

[Click here to Download Table S1](#)

**Table S2. BioID and mass spectrometry of FAZ27-BirA\*-HA non-induced control cells (-Tet).** Shown are the proteins identified by mass spectrometry analysis of the biotinylated proteins purified from non-induced control cells.

[Click here to Download Table S2](#)

**Table S3. Putative FAZ27 interacting proteins and near neighbors identified by BioID and mass spectrometry.** Shown is the list of proteins identified by mass spectrometry analysis of the biotinylated proteins purified from cells expressing FAZ27-BirA\*-HA after exclusion of the proteins identified from the non-induced control and the known ribosomal protein contaminants.

[Click here to Download Table S3](#)
